# Supplementary material for: Diversity of Flower Visiting Beetles at Higher Elevations on the Yulong Snow Mountain (Yunnan, China)
Source: MDPI journal article supplement (doi:10.3390/d13110604), 2021-11-21
Supplement: s1 [file s1]

# Diversity of flower visiting beetles at higher elevations on the Yulong Snow Mountain (Yunnan, China)

Kai-Qin Li <sup>1,2</sup>, Zong-Xin Ren <sup>3,4,\*</sup> and Qiang Li <sup>1,\*</sup>

<sup>1</sup> College of Plant Protection, Yunnan Agricultural University, Kunming, China;

<sup>2</sup> Kunming Natural History Museum of Zoology, Kunming Institute of Zoology, Chinese Academy of Sciences, Kunming, China;

<sup>3</sup> Key Laboratory for Plant Diversity and Biogeography of East Asia, Kunming Institute of Botany, Chinese Academy of Sciences, Kunming, China;

<sup>4</sup> Lijiang Forest Biodiversity National Observation and Research Station, Lijiang, China;

\* Correspondence: renzongxin@mail.kib.ac.cn, and liqiangkm@126.com

**Table S1.** Sample sites, transects, GPS information and sampling date.

| Site/Transect | GPS            | Elevation | Vegetation | Sampling date (Year/date)                                         |
|---------------|----------------|-----------|------------|-------------------------------------------------------------------|
| L_YH_M        | 27°01'41.61"N  | 2864m     | Meadow     | 2018: 7.19, 8.19, 9.15, 10.15                                     |
|               | 100°12'52.27"E |           |            | 2019: 5.21, 6.22, 7.24,8.24,9.14,10.03                            |
| L_YH_F        | 27°01'41.61"N  | 2864m     | Forest     | 2018: 7.19, 8.19, 9.15, 10.15                                     |
|               | 100°12'52.26"E |           |            | 2019: 5.21, 6.22,7.24,8.24, 9.14, 10.03                           |
| L_YS_M        | 26°59'58.05"N  | 2706m     | Meadow     | 2018: 07.19, 8.19,9.15,10.15                                      |
|               | 100°11'57.44"E |           |            | 2019: 5.21, 6.22, 7.24, 8.24, 9.14, 10.03                         |
| L_YS_F        | 26°59'58.06"N  | 2707m     | Forest     | 2018: 7.19,8.19,9.15, 10.15                                       |
|               | 100°11'57.44"E |           |            | 2019: 5.21, 6.22, 7.24, 8.24, 9.14, 10.03                         |
| L_JX_M        | 26°59'22.13"N  | 2635m     | Meadow     | 2018: 07.19, 8.19, 9.15, 10.15                                    |
|               | 100°11'50.94"E |           |            | 2019: 5.21, 6.22, 7.24, 8.24, 9.14,10.03                          |
| L_JX_F        | 26°59'22.13"N  | 2635m     | Forest     | 2018: 07.19, 8.19, 9.15, 10.15                                    |
|               | 100°11'50.94"E |           |            | 2019: 5.21, 6.22, 7.24, 8.24, 9.14,10.03                          |
| H_SK_M        | 27°00'07.20"N  | 3238m     | Meadow     | 2018: 07.18, 8.18, 9.15, 10.15                                    |
|               | 100°10'54.72"E |           |            | 2019: 5.21, 6.22 (no beetle), 7.22, 8.24, 9.15, 10.04             |
| H_SK_F        | 27°00'07.20"N  | 3240m     | Forest     | 2018: 07.18, 8.18, 9.15, 10.15 (no beetle)                        |
|               | 100°10'54.72"E |           |            | 2019: 5.21, 6.22, 7.22, 8.24, 9.15, 10.04 (no beetle)             |
| H_LX_M        | 26°59'21.73"N  | 3233m     | Meadow     | 2018: 7.18, 8.18, 9.15, 10.15 (no beetle)                         |
|               | 100°10'24.13"E |           |            | 2019: 5.21, 6.22 (no beetle), 7.22, 8.24, 9.15, 10.04 (no beetle) |
| H_LX_F        | 26°59'21.73"N  | 3233m     | Forest     | 2018: 7.18, 8.18, 9.15, 10.15 (no beetle)                         |

|        |                |       |        |                                           |
|--------|----------------|-------|--------|-------------------------------------------|
|        | 100°10'24.13"E |       |        | 2019: 5.21, 6.22, 7.22, 8.24, 9.15, 10.04 |
| H_LB_M | 26°58'42.65"N  | 3180m | Meadow | 2018: 7.18, 8.18, 9.15, 10.15             |
|        | 100°10'45.44"E |       |        | 2019: 5.21, 6.22, 7.22, 8.24, 9.15, 10.04 |
| H_LB_F | 26°58'42.65"N  | 3180m | Forest | 2018: 7.18, 8.18, 9.15, 10.15.07.18       |
|        | 100°10'45.44"E |       |        | 2019: 5.21, 6.22, 7.22, 8.24, 9.15, 10.04 |

**Table S2.** Beetle species and their families. The number of specimens for each species was given.

| Family        | Species                                      | Number of specimens |
|---------------|----------------------------------------------|---------------------|
| Attelabidae   | <i>Deporaus</i> sp.                          | 1                   |
| Brentidae     | <i>Piezotrachelus</i> sp.                    | 1                   |
| Brentidae     | <i>Protopirapion</i> sp.                     | 1                   |
| Buprestidae   | <i>Meliboeus</i> sp.                         | 1                   |
| Cantharidae   | <i>Lycocerus</i> sp.1                        | 132                 |
| Cantharidae   | <i>Silinae</i> sp.                           | 4                   |
| Cantharidae   | <i>Lycocerus longipilis</i> (Wittmer)        | 1                   |
| Cantharidae   | <i>Lycocerus metallicipennis</i> (Fairmaire) | 1                   |
| Cantharidae   | <i>Lycocerus</i> sp2.                        | 1                   |
| Cantharidae   | <i>Malthodes</i> sp.                         | 1                   |
| Cantharidae   | <i>Stenothemus grahami</i> Wittmer           | 1                   |
| Cetoniidae    | <i>Gametis jucunda</i> (Faldermann)          | 4                   |
| Chrysomelidae | <i>Nonarthra variabilis</i> Baly             | 706                 |
| Chrysomelidae | Galerucinae sp.1                             | 61                  |
| Chrysomelidae | <i>Stenoluperus</i> sp.                      | 26                  |
| Chrysomelidae | Galerucinae sp.14                            | 22                  |

|               |                                                       |    |
|---------------|-------------------------------------------------------|----|
| Chrysomelidae | Galerucinae sp.5                                      | 59 |
| Chrysomelidae | <i>Hespera</i> sp.2                                   | 10 |
| Chrysomelidae | Galerucinae sp.2                                      | 5  |
| Chrysomelidae | <i>Hespera elegans</i> Medvedev                       | 5  |
| Chrysomelidae | <i>Luperomorpha</i> sp.                               | 5  |
| Chrysomelidae | <i>Monolepta</i> sp.2                                 | 5  |
| Chrysomelidae | <i>Nonarthra</i> sp.1                                 | 4  |
| Chrysomelidae | <i>Chaetocnema cheni</i> Ruan, Konstantinov &<br>Yang | 3  |
| Chrysomelidae | Galerucinae sp.13                                     | 3  |
| Chrysomelidae | Galerucinae sp.3                                      | 3  |
| Chrysomelidae | <i>Nonarthra formosensis</i> Chûjô                    | 3  |
| Chrysomelidae | <i>Nonarthra nigripenne</i> Wang                      | 3  |
| Chrysomelidae | <i>Trichomimastra</i> sp                              | 3  |
| Chrysomelidae | Galerucinae sp.9                                      | 2  |
| Chrysomelidae | <i>Hemipyxis</i> sp.1                                 | 2  |
| Chrysomelidae | Galerucinae sp.6                                      | 2  |
| Chrysomelidae | Galerucinae sp.7                                      | 2  |
| Chrysomelidae | Altinae sp.                                           | 1  |
| Chrysomelidae | <i>Apophyllia sprecherae</i> Bezděk                   | 1  |
| Chrysomelidae | <i>Batophila impressa</i> Wang                        | 1  |
| Chrysomelidae | Galerucinae sp.10                                     | 1  |
| Chrysomelidae | Galerucinae sp.11                                     | 1  |
| Chrysomelidae | Galerucinae sp.12                                     | 1  |
| Chrysomelidae | Galerucinae sp.15                                     | 1  |

|               |                                                |    |
|---------------|------------------------------------------------|----|
| Chrysomelidae | Galerucinae sp.4                               | 1  |
| Chrysomelidae | Galerucinae sp.8                               | 1  |
| Chrysomelidae | <i>Hemipyxis plagioderoides</i> (Motschulsky)  | 1  |
| Chrysomelidae | <i>Hespera</i> sp.1                            | 1  |
| Chrysomelidae | <i>Hespera</i> sp.3                            | 1  |
| Chrysomelidae | <i>Hespera</i> sp.4                            | 1  |
| Chrysomelidae | <i>Longitarsus cyanipennis</i> Bryant          | 1  |
| Chrysomelidae | <i>Longitarsus</i> sp.                         | 1  |
| Chrysomelidae | <i>Monolepta</i> sp.1                          | 1  |
| Chrysomelidae | <i>Monolepta</i> sp.3                          | 1  |
| Chrysomelidae | <i>Nonarthra</i> sp.3                          | 1  |
| Chrysomelidae | <i>Orthaltica</i> sp.                          | 1  |
| Chrysomelidae | <i>Trachytetra cyanea</i> (Chen)               | 1  |
| Chrysomelidae | <i>Chaetocnema concinna</i> (Marsham)          | 1  |
| Coccinellidae | <i>Coccinella septemunctata</i> Linnaeus       | 13 |
| Coccinellidae | <i>Hippodamia pofanini</i> (Weise)             | 4  |
| Coccinellidae | <i>Hippodamia variegata</i> (Goeze)            | 2  |
| Coccinellidae | <i>Coccinella transversoguttata</i> Faldermann | 2  |
| Coccinellidae | <i>Scymnus sinuanodulus</i> Yu and Yao         | 2  |
| Coccinellidae | <i>Harmonia eucharis</i> (Mulsant)             | 1  |
| Coccinellidae | <i>Oenopia flavidbruna</i> Jing                | 1  |
| Coccinellidae | <i>Scymnus kawamuyai</i> (Ohta)                | 1  |
| Coccinellidae | <i>Scymnus</i> sp.1                            | 1  |
| Coccinellidae | <i>Macronaemia hauseri</i> (Weise)             | 1  |
| Corylophidae  | Corylophidae sp.                               | 1  |

|                |                                                  |     |
|----------------|--------------------------------------------------|-----|
| Crioceridae    | <i>Bruchidius lautus</i> (Sharp)                 | 168 |
| Crioceridae    | <i>Borowiecius</i> sp.                           | 2   |
| Crioceridae    | <i>Bruchidius</i> sp.1                           | 1   |
| Crioceridae    | <i>Bruchidius</i> sp.2                           | 1   |
| Crioceridae    | <i>Donacia</i> sp.                               | 1   |
| Cryptophagidae | <i>Antherophagus</i> sp.                         | 1   |
| Curculionidae  | <i>Xenysmoderes</i> sp.                          | 16  |
| Curculionidae  | <i>Derelomus</i> sp.                             | 10  |
| Curculionidae  | <i>Anthinobaris</i> sp.                          | 6   |
| Curculionidae  | <i>Ochyromera</i> sp.                            | 6   |
| Curculionidae  | <i>Nespilobaris</i> sp.                          | 2   |
| Curculionidae  | <i>Archarius</i> sp.                             | 1   |
| Curculionidae  | Ceutorhynchinae sp.                              | 1   |
| Curculionidae  | <i>Cyrtepidomus castaneus</i> (Roelofs)          | 1   |
| Curculionidae  | <i>Orchestes</i> sp.                             | 1   |
| Curculionidae  | <i>Phyllobius</i> sp.                            | 1   |
| Elateridae     | <i>Platynychus nebulosus</i> Motschulsky         | 51  |
| Elateridae     | <i>Agrypnus argillaceus argillaceus</i> (Solsky) | 1   |
| Elateridae     | <i>Dycronychus</i> sp.                           | 1   |
| Elateridae     | <i>Gamepentes kresli</i> Schimmel et Tarnawski   | 1   |
| Elateridae     | <i>Glyphonyx</i> sp.                             | 1   |
| Eumolpidae     | Eumolpidinae sp.1                                | 4   |
| Eumolpidae     | Eumolpidinae sp.2                                | 1   |
| Eumolpidae     | Eumolpidinae sp.3                                | 1   |
| Lycidae        | <i>Lycostomus</i> sp.                            | 1   |

|               |                                         |     |
|---------------|-----------------------------------------|-----|
| Melolonthidae | <i>Archeohomaloplia</i> sp.2            | 3   |
| Melolonthidae | <i>Archeohomaloplia</i> sp.1            | 2   |
| Melyeridae    | Malachiinae sp.1                        | 4   |
| Melyeridae    | Dasytinae sp.                           | 1   |
| Melyeridae    | Malachiinae sp.2                        | 1   |
| Mordellidae   | Mordellidae sp.1                        | 60  |
| Mordellidae   | Mordellidae sp.3                        | 5   |
| Mordellidae   | Mordellidae sp.2                        | 1   |
| Nitidulidae   | <i>Lamiogethes</i> sp.1                 | 672 |
| Nitidulidae   | Epuracinae sp.1                         | 383 |
| Nitidulidae   | Epuracinae sp.5                         | 174 |
| Nitidulidae   | Epuracinae sp.8                         | 90  |
| Nitidulidae   | Epuracinae sp.6                         | 76  |
| Nitidulidae   | Epuracinae sp.2                         | 50  |
| Nitidulidae   | Epuracinae sp.7                         | 45  |
| Nitidulidae   | <i>Lamiogethes</i> sp.4                 | 17  |
| Nitidulidae   | <i>Meligethes auripilis</i> Reitter     | 17  |
| Nitidulidae   | Epuracinae sp.3                         | 15  |
| Nitidulidae   | <i>Brassicogethes affinis</i> (Jelínek) | 14  |
| Nitidulidae   | Epuracinae sp.9                         | 14  |
| Nitidulidae   | <i>Lamiogethes</i> sp.2                 | 14  |
| Nitidulidae   | <i>Meligethes binotatus</i> Grouvelle   | 12  |
| Nitidulidae   | <i>Lamiogethes</i> sp.5                 | 12  |
| Nitidulidae   | Meligethinae sp.5                       | 9   |
| Nitidulidae   | Nitidulinae sp.1                        | 7   |

|             |                                                              |    |
|-------------|--------------------------------------------------------------|----|
| Nitidulidae | Meligethinae                                                 | 6  |
| Nitidulidae | <i>Lamiogethes pseudoviridiangustus</i>                      | 4  |
| Nitidulidae | <i>Lamiogethes</i> sp.3                                      | 4  |
| Nitidulidae | Epuraeinae sp.13                                             | 3  |
| Nitidulidae | <i>Meligethinus tschungseni</i> Kirejtshuk                   | 3  |
| Nitidulidae | Niditulidae sp.2                                             | 3  |
| Nitidulidae | Epuraeinae sp.                                               | 2  |
| Nitidulidae | <i>Meligethes chinensis</i> Kirejtshuk                       | 2  |
| Nitidulidae | <i>Afrogethes bocaki</i> (Audisio, Jelinek et Coote)         | 1  |
| Nitidulidae | Epuraeinae sp.12                                             | 1  |
| Nitidulidae | Epuraeinae sp.15                                             | 1  |
| Nitidulidae | Epuraeinae sp.16                                             | 1  |
| Nitidulidae | Meligethinae sp.2                                            | 1  |
| Nitidulidae | Meligethinae sp.3                                            | 1  |
| Nitidulidae | Meligethinae sp.4                                            | 1  |
| Nitidulidae | Nitidulidae sp.1                                             | 1  |
| Nitidulidae | <i>Lamiogethes chlorocupreus</i> (Audisio, Jelinek et Coote) | 1  |
| Omethidae   | Omethidae sp.                                                | 4  |
| Rutelidae   | <i>Popillia cribricollis</i> Ohaus                           | 56 |
| Rutelidae   | <i>Popillia</i> sp.2                                         | 11 |
| Rutelidae   | <i>Popillia pustulata</i> Fairm.                             | 5  |
| Scirtidae   | Scirtidae sp.                                                | 3  |
| Scirtidae   | <i>Scritis</i> sp.                                           | 4  |
| Scraptiidae | <i>Anaspis</i> sp.1                                          | 1  |



|               |                         |    |
|---------------|-------------------------|----|
| Scraptiidae   | Scraptiidae sp.2        | 1  |
| Scraptiidae   | <i>Anaspis</i> sp.2     | 31 |
| Staphylinidae | <i>Eusphalerum</i> sp.1 | 51 |
| Staphylinidae | <i>Eusphalerum</i> sp.2 | 31 |
| Staphylinidae | Aleocarinae sp.3        | 19 |
| Staphylinidae | Aleocarinae sp.1        | 8  |
| Staphylinidae | <i>Eusphalerum</i> sp.3 | 4  |
| Staphylinidae | Aleocarinae sp.2        | 1  |
| Staphylinidae | <i>Coproporus</i> sp.   | 1  |
| Tenebrionidae | <i>Lagria</i> sp.2      | 7  |
| Tenebrionidae | Cteniopodini sp.        | 2  |
| Tenebrionidae | Alleculini sp.          | 1  |
| Tenebrionidae | Alleculini sp.2         | 1  |
| Tenebrionidae | <i>Lagria</i> sp.1      | 1  |

**Table S3.** Plant species and their families. A plant marked as inflorescence refers to a large flower display in a more or less condensed inflorescence with many tiny flowers, including inflorescence type of Apiaceae (Umbel) and Asteraceae (Head).

| Family    | Species                         | Inflorescence/flower type |
|-----------|---------------------------------|---------------------------|
| Adoxaceae | <i>Viburnum betulifolium</i>    | Inflorescence             |
| Adoxaceae | <i>Viburnum cylindricum</i>     | Inflorescence             |
| Apiaceae  | <i>Physospermopsis delavayi</i> | Inflorescence (Umbel)     |
| Apiaceae  | <i>Pimpinella candolleana</i>   | Inflorescence (Umbel)     |

---

|                |                                   |                       |
|----------------|-----------------------------------|-----------------------|
| Apiaceae       | <i>Pimpinella yunnanensis</i>     | Inflorescence (Umbel) |
| Asteraceae     | <i>Ajania quercifolia</i>         | Inflorescence (Head)  |
| Asteraceae     | <i>Anaphalis aureo-punctata</i>   | Inflorescence (Head)  |
| Asteraceae     | <i>Anaphalis nepalensis</i>       | Inflorescence (Head)  |
| Asteraceae     | <i>Aster jeffreyanus</i>          | Inflorescence (Head)  |
| Asteraceae     | <i>Aster oreophilus</i>           | Inflorescence (Head)  |
| Asteraceae     | <i>Cirsium henryi</i>             | Inflorescence (Head)  |
| Asteraceae     | <i>Cirsium lidjiangense</i>       | Inflorescence (Head)  |
| Asteraceae     | <i>Cirsium shansiense</i>         | Inflorescence (Head)  |
| Asteraceae     | <i>Crepis napifera</i>            | Inflorescence (Head)  |
| Asteraceae     | <i>Eupatorium heterophyllum</i>   | Inflorescence (Head)  |
| Asteraceae     | <i>Eupatorium lindleyanum</i>     | Inflorescence (Head)  |
| Asteraceae     | <i>Inula helianthus-aquatilis</i> | Inflorescence (Head)  |
| Asteraceae     | <i>Leontopodium calocephalum</i>  | Inflorescence (Head)  |
| Asteraceae     | <i>Leontopodium dedekensii</i>    | Inflorescence (Head)  |
| Asteraceae     | <i>Leontopodium sinense</i>       | Inflorescence (Head)  |
| Asteraceae     | <i>Ligularia alatipes</i>         | Inflorescence (Head)  |
| Asteraceae     | <i>Ligularia lapathifolia</i>     | Inflorescence (Head)  |
| Asteraceae     | <i>Senecio scandens</i>           | Inflorescence (Head)  |
| Asteraceae     | <i>Senecio spathiphyllus</i>      | Inflorescence (Head)  |
| Asteraceae     | <i>Taraxacum mongolicum</i>       | Inflorescence (Head)  |
| Asteraceae     | <i>Youngia paleacea</i>           | Inflorescence (Head)  |
| Boraginaceae   | <i>Cynoglossum anabile</i>        | Blue flower           |
| Campanulaceae  | <i>Adenophora coelestis</i>       | Pedant flower         |
| Caprifoliaceae | <i>Dipsacus asper</i>             | Inflorescence (Head)  |

---

---

|               |                                     |                                         |
|---------------|-------------------------------------|-----------------------------------------|
| Celastraceae  | <i>Parnassia wightiana</i>          | Single white flower                     |
| Commelinaceae | <i>Commelina maculata</i>           | Blue flower                             |
| Daphnaceae    | <i>Stellera chamaejasme</i>         | Inflorescence (Umbel)                   |
| Dianthaceae   | <i>Silene asclepiadea</i>           | Pink flower                             |
| Ericaceae     | <i>Rhododendron decorum</i>         | Big white flower                        |
| Ericaceae     | <i>Rhododendron yunnanense</i>      | Big white-pink flower                   |
| Eriocaulaceae | <i>Eriocaulon henryanum</i>         | Inflorescence (Head)                    |
| Fabaceae      | <i>Astragalus camptodontus</i>      | Papilionaceous corolla                  |
| Fabaceae      | <i>Astragalus pullus</i>            | Papilionaceous corolla                  |
| Fabaceae      | <i>Desmodium yunnanense</i>         | Papilionaceous corolla                  |
| Fabaceae      | <i>Indigofera balfouriana</i>       | Papilionaceous corolla                  |
| Fabaceae      | <i>Indigofera lenticellata</i>      | Papilionaceous corolla                  |
| Fabaceae      | <i>Indigofera pendula</i>           | Papilionaceous corolla                  |
| Fabaceae      | <i>Lespedeza formosa</i>            | Papilionaceous corolla                  |
| Fabaceae      | <i>Lotus corniculatus japonicus</i> | Papilionaceous corolla                  |
| Fabaceae      | <i>Trifolium repens</i>             | Papilionaceous corolla                  |
| Geraniaceae   | <i>Geranium nepalense</i>           | Single flower                           |
| Geraniaceae   | <i>Geranium pylzowianum</i>         | Single flower                           |
| Geraniaceae   | <i>Geranium strictipes</i>          | Single flower                           |
| Gentianaceae  | <i>Gentiana souliei</i>             | Single flower                           |
| Gentianaceae  | <i>Halenia elliptica</i>            | Purple flower                           |
| Gentianaceae  | <i>Lomatogonium lijiangense</i>     | Purple flower                           |
| Hypericaceae  | <i>Hypericum bellum</i>             | Big yellow flower with many androdecium |
| Hypericaceae  | <i>Hypericum chosiyanum</i>         | Big yellow flower with many androdecium |
| Hydrangeaceae | <i>Philadelphus calvescens</i>      | Inflorescence                           |

---

---

|               |                                    |                                  |
|---------------|------------------------------------|----------------------------------|
| Juncaceae     | <i>Juncus allioides</i>            | Inflorescence (Head)             |
| Lamiaceae     | <i>Clinopodium repens</i>          | Pink flower                      |
| Lamiaceae     | <i>Elsholtzia fruticosa</i>        | Inflorescence (Head)             |
| Lamiaceae     | <i>Isodon angustifolius</i>        | White flower                     |
| Lamiaceae     | <i>Skapanthus oreophilus</i>       | Purple flower                    |
| Nartheciaceae | <i>Aletris pauciflora</i>          | Inflorescence                    |
| Nartheciaceae | <i>Aletris pauciflora khasiana</i> | Inflorescence                    |
| Oleaceae      | <i>Jasminum officinale</i>         | White flower                     |
| Oleaceae      | <i>Ligustrum quihoui</i>           | Inflorescence                    |
| Orobanchaceae | <i>Pedicularis cephalantha</i>     | Pink flower (pollen reward only) |
| Orobanchaceae | <i>Pedicularis densispica</i>      | Pink flower                      |
| Orchidaceae   | <i>Spiranthes sinensis</i>         | Inflorescence                    |
| Polygonaceae  | <i>Fagopyrum dibotrys</i>          | Inflorescence                    |
| Polygonaceae  | <i>Polygonum paleaceum</i>         | Inflorescence (Head)             |
| Polygonaceae  | <i>Polygonum viviparum</i>         | Inflorescence (Head)             |
| Polygonaceae  | <i>Polygonum runcinatum</i>        | Inflorescence (Head)             |
| Primulaceae   | <i>Primula poissonii</i>           | Purple flower                    |
| Ranunculaceae | <i>Anemone demissa yunnanensis</i> | White flower                     |
| Ranunculaceae | <i>Anemone exigua</i>              | White flower                     |
| Ranunculaceae | <i>Anemone rivularis</i>           | White flower                     |
| Ranunculaceae | <i>Anemone rupestris</i>           | White flower                     |
| Ranunculaceae | <i>Caltha pathustris</i>           | Big yellow flower                |
| Ranunculaceae | <i>Ranunculus japonicus</i>        | Yellow flower                    |
| Ranunculaceae | <i>Ranunculus nephelogenes</i>     | Yellow flower                    |
| Ranunculaceae | <i>Thalictrum delavayi</i>         | Inflorescence                    |

---

|                  |                                      |                       |
|------------------|--------------------------------------|-----------------------|
| Ranunculaceae    | <i>Thalictrum javanicum</i>          | Inflorescence         |
| Rosaceae         | <i>Geum aleppicum</i>                | Inflorescence (Head)  |
| Rosaceae         | <i>Potentilla fulgens</i>            | Big yellow flower     |
| Rosaceae         | <i>Pyracantha fortuneana</i>         | Inflorescence         |
| Rosaceae         | <i>Rosa omeiensis</i>                | Big white flower      |
| Rosaceae         | <i>Saguisorba filiformis</i>         | Inflorescence (Umbel) |
| Rutaceae         | <i>Boenninghausenia albiflora</i>    | Small white flower    |
| Rutaceae         | <i>Boenninghausenia sessilicarpa</i> | Small white flower    |
| Saxifragaceae    | <i>Saxifraga diversifolia</i>        | Yellow flower         |
| Saxifragaceae    | <i>Saxifraga strigosa</i>            | White flower          |
| Scrophulariaceae | <i>Verbascum thapsus</i>             | Yellow flower         |

**Table S4.** Sampling completeness estimations for different elevation and habitats using the iNEXT method.

|                                       | Observed | Estimator | Est_s.e. | 95% Lower | 95% Upper |
|---------------------------------------|----------|-----------|----------|-----------|-----------|
| <b>High elevation meadows (n = 3)</b> |          |           |          |           |           |
| Species Richness                      | 40       | 183.804   | 118.026  | 75.231    | 626.969   |
| Shannon diversity                     | 3.206    | 3.482     | 0.281    | 3.206     | 4.033     |
| Simpson diversity                     | 1.626    | 1.627     | 0.061    | 1.626     | 1.746     |
| <b>High elevation forests (n = 3)</b> |          |           |          |           |           |
| Species Richness                      | 49       | 79.03     | 19.24    | 58.514    | 143.788   |
| Shannon diversity                     | 14.632   | 15.741    | 0.963    | 14.632    | 17.63     |
| Simpson diversity                     | 7.768    | 7.862     | 0.592    | 7.768     | 9.022     |
| <b>Low elevation meadows (n = 3)</b>  |          |           |          |           |           |

|                                      |        |         |        |         |         |
|--------------------------------------|--------|---------|--------|---------|---------|
| Species Richness                     | 50     | 76.844  | 15.425 | 59.423  | 126.473 |
| Shannon diversity                    | 13.026 | 13.976  | 0.893  | 13.026  | 15.727  |
| Simpson diversity                    | 7.751  | 7.84    | 0.391  | 7.751   | 8.606   |
| <b>Low elevation forests (n = 3)</b> |        |         |        |         |         |
| Species Richness                     | 80     | 177.935 | 45.575 | 121.121 | 313.242 |
| Shannon diversity                    | 8.996  | 9.525   | 0.453  | 8.996   | 10.413  |
| Simpson diversity                    | 4.389  | 4.399   | 0.146  | 4.389   | 4.686   |

**Table S5.** Network turnover among different transects (n =12). H and L refer to high elevation and low elevation, F and M refer to forest and meadow.

| Network_1 | Network_2 | Binary | $\beta_s$ | $\beta_{os}$ | $\beta_{WN}$ | $\beta_{ST}$ |
|-----------|-----------|--------|-----------|--------------|--------------|--------------|
| H_LB_F    | H_LB_M    | TRUE   | 0.9493033 | 0.02173913   | 1            | 0.9782609    |
| H_LB_F    | H_LX_F    | TRUE   | 0.3769594 | 0.26906577   | 0.5215325    | 0.2524668    |
| H_LB_F    | H_LX_M    | TRUE   | 0.9769055 | 0.17303017   | 0.994709     | 0.8216788    |
| H_LB_F    | H_SK_F    | TRUE   | 0.3483221 | 0.34479997   | 0.5640557    | 0.2192557    |
| H_LB_F    | H_SK_M    | TRUE   | 0.9805825 | 0            | 1            | 1            |
| H_LB_F    | L_JX_F    | TRUE   | 0.9767424 | 0.00296443   | 1            | 0.9970356    |
| H_LB_F    | L_JX_M    | TRUE   | 0.9590781 | 0.00617284   | 1            | 0.9938272    |
| H_LB_F    | L_YH_F    | TRUE   | 0.8691288 | 0.19457774   | 0.9344948    | 0.7399171    |
| H_LB_F    | L_YH_M    | TRUE   | 0.9735445 | 0.01644737   | 1            | 0.9835526    |
| H_LB_F    | L_YS_F    | TRUE   | 0.9742847 | 0            | 1            | 1            |
| H_LB_F    | L_YS_M    | TRUE   | 0.9820307 | 0.01515152   | 1            | 0.9848485    |
| H_LB_M    | H_LX_F    | TRUE   | 0.9483463 | 0.04970271   | 1            | 0.9502973    |

|        |        |      |           |            |           |           |
|--------|--------|------|-----------|------------|-----------|-----------|
| H_LB_M | H_LX_M | TRUE | 0.902749  | 0.09270761 | 0.9438693 | 0.8511617 |
| H_LB_M | H_SK_F | TRUE | 0.9543247 | 0          | 1         | 1         |
| H_LB_M | H_SK_M | TRUE | 0.9202195 | 0.17225974 | 0.9805825 | 0.8083228 |
| H_LB_M | L_JX_F | TRUE | 0.8922925 | 0.23715415 | 1         | 0.7628458 |
| H_LB_M | L_JX_M | TRUE | 0.8818662 | 0.11486849 | 0.9958848 | 0.8810163 |
| H_LB_M | L_YH_F | TRUE | 0.907619  | 0.11197508 | 0.9791271 | 0.8671521 |
| H_LB_M | L_YH_M | TRUE | 0.9048913 | 0.03918764 | 1         | 0.9608124 |
| H_LB_M | L_YS_F | TRUE | 0.9046823 | 0.22403382 | 1         | 0.7759662 |
| H_LB_M | L_YS_M | TRUE | 0.934563  | 0.06774264 | 0.9949495 | 0.9272069 |
| H_LX_F | H_LX_M | TRUE | 0.9801587 | 0.21957672 | 0.994709  | 0.7751323 |
| H_LX_F | H_SK_F | TRUE | 0.3925486 | 0.22990544 | 0.4962266 | 0.2663211 |
| H_LX_F | H_SK_M | TRUE | 0.9854369 | 0          | 1         | 1         |
| H_LX_F | L_JX_F | TRUE | 0.9776443 | 0.0042735  | 1         | 0.9957265 |
| H_LX_F | L_JX_M | TRUE | 0.9811649 | 0.00854701 | 1         | 0.991453  |
| H_LX_F | L_YH_F | TRUE | 0.8780632 | 0.2469307  | 0.9364245 | 0.6894938 |
| H_LX_F | L_YH_M | TRUE | 0.9891475 | 0          | 1         | 1         |
| H_LX_F | L_YS_F | TRUE | 0.9700855 | 0.0042735  | 0.9978632 | 0.9935897 |
| H_LX_F | L_YS_M | TRUE | 0.982129  | 0.000777   | 0.991453  | 0.990676  |
| H_LX_M | H_SK_F | TRUE | 0.9496229 | 0.32445401 | 0.994709  | 0.670255  |
| H_LX_M | H_SK_M | TRUE | 0.3399342 | 0.23882725 | 0.6813582 | 0.4425309 |
| H_LX_M | L_JX_F | TRUE | 0.9947247 | 0          | 1         | 1         |
| H_LX_M | L_JX_M | TRUE | 0.7039976 | 0.28248089 | 0.8559671 | 0.5734862 |
| H_LX_M | L_YH_F | TRUE | 0.978206  | 0.1724421  | 1         | 0.8275579 |
| H_LX_M | L_YH_M | TRUE | 0.7235798 | 0.39149958 | 0.8840852 | 0.4925856 |
| H_LX_M | L_YS_F | TRUE | 0.9933354 | 0          | 1         | 1         |

|        |        |      |           |            |           |           |
|--------|--------|------|-----------|------------|-----------|-----------|
| H_LX_M | L_YS_M | TRUE | 0.6813372 | 0.31673882 | 0.9191919 | 0.6024531 |
| H_SK_F | H_SK_M | TRUE | 0.9635836 | 0.00265957 | 1         | 0.9973404 |
| H_SK_F | L_JX_F | TRUE | 0.9072933 | 0          | 1         | 1         |
| H_SK_F | L_JX_M | TRUE | 0.946907  | 0.01440329 | 1         | 0.9855967 |
| H_SK_F | L_YH_F | TRUE | 0.8242763 | 0.25171081 | 0.9305382 | 0.6788274 |
| H_SK_F | L_YH_M | TRUE | 0.9582167 | 0.00328947 | 1         | 0.9967105 |
| H_SK_F | L_YS_F | TRUE | 0.9084834 | 0.00265957 | 1         | 0.9973404 |
| H_SK_F | L_YS_M | TRUE | 0.9656942 | 0          | 1         | 1         |
| H_SK_M | L_JX_F | TRUE | 0.9950593 | 0          | 1         | 1         |
| H_SK_M | L_JX_M | TRUE | 0.7918814 | 0.1987095  | 0.9926485 | 0.793939  |
| H_SK_M | L_YH_F | TRUE | 0.9773985 | 0.22006472 | 1         | 0.7799353 |
| H_SK_M | L_YH_M | TRUE | 0.7719937 | 0.35715807 | 0.9188809 | 0.5617229 |
| H_SK_M | L_YS_F | TRUE | 0.9924902 | 0          | 1         | 1         |
| H_SK_M | L_YS_M | TRUE | 0.7801804 | 0.23347553 | 0.976954  | 0.7434785 |
| L_JX_F | L_JX_M | TRUE | 0.8381561 | 0.28955822 | 0.9659152 | 0.676357  |
| L_JX_F | L_YH_F | TRUE | 0.8249263 | 0.32622758 | 0.9350976 | 0.60887   |
| L_JX_F | L_YH_M | TRUE | 0.8952959 | 0.10826659 | 0.9894685 | 0.8812019 |
| L_JX_F | L_YS_F | TRUE | 0.5431404 | 0.35707409 | 0.7039627 | 0.3468886 |
| L_JX_F | L_YS_M | TRUE | 0.9476285 | 0.00702679 | 1         | 0.9929732 |
| L_JX_M | L_YH_F | TRUE | 0.8971545 | 0.13792646 | 0.9822819 | 0.8443554 |
| L_JX_M | L_YH_M | TRUE | 0.5792181 | 0.26654213 | 0.7860895 | 0.5195473 |
| L_JX_M | L_YS_F | TRUE | 0.9291706 | 0.01396803 | 0.9917695 | 0.9778015 |
| L_JX_M | L_YS_M | TRUE | 0.6283202 | 0.34670782 | 0.7947999 | 0.448092  |
| L_YH_F | L_YH_M | TRUE | 0.7279911 | 0.23474483 | 0.9649581 | 0.7302132 |
| L_YH_F | L_YS_F | TRUE | 0.6368332 | 0.27489093 | 0.9805462 | 0.7056553 |



|        |        |      |           |            |           |           |
|--------|--------|------|-----------|------------|-----------|-----------|
| L_YH_F | L_YS_M | TRUE | 0.9346357 | 0.13888889 | 0.9943074 | 0.8554185 |
| L_YH_M | L_YS_F | TRUE | 0.852058  | 0.00106838 | 1         | 0.9989316 |
| L_YH_M | L_YS_M | TRUE | 0.648126  | 0.33213716 | 0.7785752 | 0.4464381 |
| L_YS_F | L_YS_M | TRUE | 0.923174  | 0.01845377 | 0.9893162 | 0.9708625 |

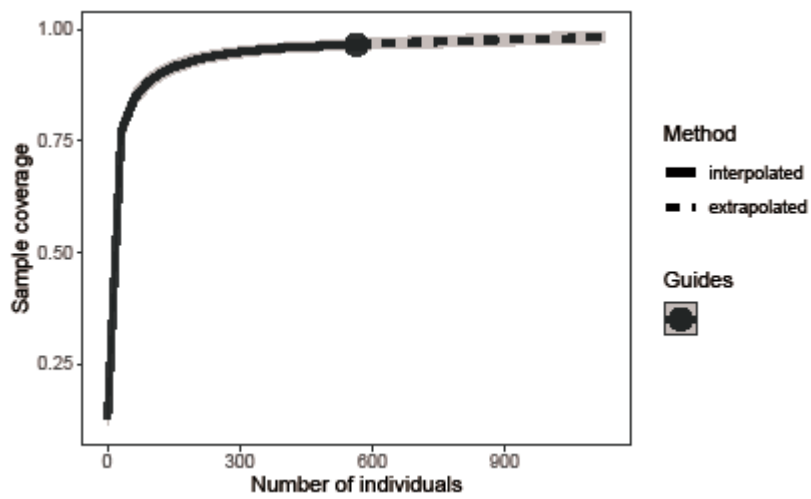

**Figure S1.** An example of sampling completeness (species coverage) for three forest transects at the high elevation.

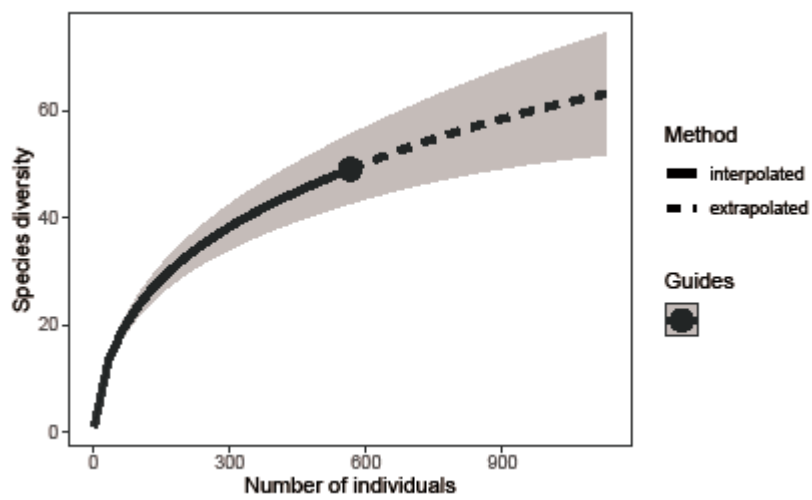

**Figure S2.** An example of sampling completeness (species diversity) for three forest transects at the high elevation.
